# Supplementary material for: Metabolic Reprogramming in Response to Alterations of Mitochondrial DNA and Mitochondrial Dysfunction in Gastric Adenocarcinoma
Source: MDPI journal article supplement (doi:10.3390/ijms23031857), 2022-02-06
Supplement: s1 [file s1]

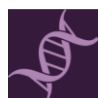

Article

# Supplementary Materials: Metabolic reprogramming in response to alterations of mitochondrial DNA and dysfunction of mitochondrial respiration in gastric adenocarcinoma

Tzu-Ching Chang, Hui-Ting Lee, Siao-Cian Pan, Shih-Han Cho, Chien Cheng, Liang-Hung Ou, Chia-I Lin, Chen-Sung Lin and Yau-Huei Wei

**Table S1.** Summary of the D310 alterations between the paired non-cancerous gastric mucosa (NC-GM) and the gastric adenocarcinoma (GAC) of 57 GAC patients

| D310mutation | Types of<br>D310 alterations                      | Patients | D310 characteristics                 |                   |                  |              |                              |                   |                  |              |
|--------------|---------------------------------------------------|----------|--------------------------------------|-------------------|------------------|--------------|------------------------------|-------------------|------------------|--------------|
|              |                                                   |          | Non-cancerous gastric mucosa (NC-GM) |                   |                  |              | Gastric adenocarcinoma (GAC) |                   |                  |              |
|              |                                                   |          | D310*<br>variants                    | Variant<br>number | Major<br>variant | Pattern      | D310*<br>variants            | Variant<br>number | Major<br>variant | Pattern      |
| No (n=30)    | Type I, Homoplasmic to<br>homoplasmic (n=17)      | GAC 01   | 7                                    | 1                 | 7                | Homoplasmy   | 7                            | 1                 | 7                | Homoplasmy   |
|              |                                                   | GAC 03   | 7                                    | 1                 | 7                | Homoplasmy   | 7                            | 1                 | 7                | Homoplasmy   |
|              |                                                   | GAC 04   | 7                                    | 1                 | 7                | Homoplasmy   | 7                            | 1                 | 7                | Homoplasmy   |
|              |                                                   | GAC 07   | 7                                    | 1                 | 7                | Homoplasmy   | 7                            | 1                 | 7                | Homoplasmy   |
|              |                                                   | GAC 09   | 7                                    | 1                 | 7                | Homoplasmy   | 7                            | 1                 | 7                | Homoplasmy   |
|              |                                                   | GAC 21   | 7                                    | 1                 | 7                | Homoplasmy   | 7                            | 1                 | 7                | Homoplasmy   |
|              |                                                   | GAC 25   | 7                                    | 1                 | 7                | Homoplasmy   | 7                            | 1                 | 7                | Homoplasmy   |
|              |                                                   | GAC 27   | 7                                    | 1                 | 7                | Homoplasmy   | 7                            | 1                 | 7                | Homoplasmy   |
|              |                                                   | GAC 29   | 7                                    | 1                 | 7                | Homoplasmy   | 7                            | 1                 | 7                | Homoplasmy   |
|              |                                                   | GAC 36   | 7                                    | 1                 | 7                | Homoplasmy   | 7                            | 1                 | 7                | Homoplasmy   |
|              |                                                   | GAC 41   | 7                                    | 1                 | 7                | Homoplasmy   | 7                            | 1                 | 7                | Homoplasmy   |
|              |                                                   | GAC 46   | 7                                    | 1                 | 7                | Homoplasmy   | 7                            | 1                 | 7                | Homoplasmy   |
|              |                                                   | GAC 48   | 7                                    | 1                 | 7                | Homoplasmy   | 7                            | 1                 | 7                | Homoplasmy   |
|              |                                                   | GAC 57   | 7                                    | 1                 | 7                | Homoplasmy   | 7                            | 1                 | 7                | Homoplasmy   |
|              |                                                   | GAC 60   | 7                                    | 1                 | 7                | Homoplasmy   | 7                            | 1                 | 7                | Homoplasmy   |
|              |                                                   | GAC 61   | 7                                    | 1                 | 7                | Homoplasmy   | 7                            | 1                 | 7                | Homoplasmy   |
|              |                                                   | GAC 62   | 7                                    | 1                 | 7                | Homoplasmy   | 7                            | 1                 | 7                | Homoplasmy   |
|              | Type II, Heteroplasmic to<br>heteroplasmic (n=13) | GAC 02   | 9,8                                  | 2                 | 9                | Heteroplasmy | 9,8                          | 2                 | 9                | Heteroplasmy |
|              |                                                   | GAC 08   | 8,7                                  | 2                 | 8                | Heteroplasmy | 8,7                          | 2                 | 8                | Heteroplasmy |
|              |                                                   | GAC 12   | 8,7                                  | 2                 | 8                | Heteroplasmy | 8,7                          | 2                 | 8                | Heteroplasmy |
|              |                                                   | GAC 14   | 8,7                                  | 2                 | 8                | Heteroplasmy | 8,7                          | 2                 | 8                | Heteroplasmy |
|              |                                                   | GAC 15   | 8,7                                  | 2                 | 8                | Heteroplasmy | 8,7                          | 2                 | 8                | Heteroplasmy |
|              |                                                   | GAC 18   | 8,9                                  | 2                 | 8                | Heteroplasmy | 8,9                          | 2                 | 8                | Heteroplasmy |
|              |                                                   | GAC 20   | 8,7                                  | 2                 | 8                | Heteroplasmy | 8,7                          | 2                 | 8                | Heteroplasmy |
|              |                                                   | GAC 28   | 8,9                                  | 2                 | 8                | Heteroplasmy | 8,9                          | 2                 | 8                | Heteroplasmy |

|            |                                                 |        |          |   |   |              |          |   |   |              |
|------------|-------------------------------------------------|--------|----------|---|---|--------------|----------|---|---|--------------|
|            |                                                 | GAC 31 | 8,7      | 2 | 8 | Heteroplasmy | 8,7      | 2 | 8 | Heteroplasmy |
|            |                                                 | GAC 34 | 8,9      | 2 | 8 | Heteroplasmy | 8,9      | 2 | 8 | Heteroplasmy |
|            |                                                 | GAC 39 | 8,7,9    | 3 | 8 | Heteroplasmy | 8,7,9    | 3 | 8 | Heteroplasmy |
|            |                                                 | GAC 53 | 8,7      | 2 | 8 | Heteroplasmy | 8,7      | 2 | 8 | Heteroplasmy |
|            |                                                 | GAC 55 | 8,7      | 2 | 8 | Heteroplasmy | 8,7      | 2 | 8 | Heteroplasmy |
| Yes (n=27) | Type III, Heteroplasmic to heteroplasmic (n=22) | GAC 05 | 8,9,7    | 3 | 8 | Heteroplasmy | 9,8,10   | 3 | 9 | Heteroplasmy |
|            |                                                 | GAC 06 | 8,7      | 2 | 8 | Heteroplasmy | 8,7      | 2 | 8 | Heteroplasmy |
|            |                                                 | GAC 10 | 9,8,10,7 | 4 | 9 | Heteroplasmy | 7,9      | 2 | 7 | Heteroplasmy |
|            |                                                 | GAC 11 | 8,7      | 2 | 8 | Heteroplasmy | 8,7      | 2 | 8 | Heteroplasmy |
|            |                                                 | GAC 13 | 8,7      | 2 | 8 | Heteroplasmy | 8,7,9    | 3 | 8 | Heteroplasmy |
|            |                                                 | GAC 16 | 8,7      | 2 | 8 | Heteroplasmy | 8,7,9    | 3 | 8 | Heteroplasmy |
|            |                                                 | GAC 17 | 8,7      | 2 | 8 | Heteroplasmy | 8,9,7    | 3 | 8 | Heteroplasmy |
|            |                                                 | GAC 19 | 8,9,7    | 3 | 8 | Heteroplasmy | 7,8,9    | 3 | 7 | Heteroplasmy |
|            |                                                 | GAC 22 | 8,7      | 2 | 8 | Heteroplasmy | 7,8      | 2 | 7 | Heteroplasmy |
|            |                                                 | GAC 23 | 8,7,9    | 3 | 8 | Heteroplasmy | 8,10,9,7 | 4 | 8 | Heteroplasmy |
|            |                                                 | GAC 24 | 9,8      | 2 | 9 | Heteroplasmy | 9,8,10   | 3 | 9 | Heteroplasmy |
|            |                                                 | GAC 30 | 8,7      | 2 | 8 | Heteroplasmy | 8,7      | 2 | 8 | Heteroplasmy |
|            |                                                 | GAC 32 | 8,7      | 2 | 8 | Heteroplasmy | 8,7      | 2 | 8 | Heteroplasmy |
|            |                                                 | GAC 35 | 9,8      | 2 | 9 | Heteroplasmy | 9,8,10   | 3 | 9 | Heteroplasmy |
|            |                                                 | GAC 38 | 7,8      | 2 | 7 | Heteroplasmy | 8,7      | 2 | 8 | Heteroplasmy |
|            |                                                 | GAC 42 | 9,8      | 2 | 9 | Heteroplasmy | 8,9      | 2 | 8 | Heteroplasmy |
|            |                                                 | GAC 43 | 8,7      | 2 | 8 | Heteroplasmy | 8,7,9    | 3 | 8 | Heteroplasmy |
|            |                                                 | GAC 47 | 9,8,10   | 3 | 9 | Heteroplasmy | 9,8,10   | 3 | 9 | Heteroplasmy |
|            |                                                 | GAC 52 | 8,7      | 2 | 8 | Heteroplasmy | 8,9      | 2 | 8 | Heteroplasmy |
|            |                                                 | GAC 59 | 9,8,7,6  | 4 | 9 | Heteroplasmy | 9,8,10   | 3 | 9 | Heteroplasmy |
|            |                                                 | GAC 63 | 9,8      | 2 | 9 | Heteroplasmy | 9,8      | 2 | 9 | Heteroplasmy |
|            |                                                 | GAC 65 | 8,7      | 2 | 8 | Heteroplasmy | 8,9,6,7  | 4 | 8 | Heteroplasmy |
|            | Type IV, Heteroplasmic to homoplasmic (n=5)     | GAC 26 | 8,7      | 2 | 8 | Heteroplasmy | 8        | 1 | 8 | Homoplasmy   |
|            |                                                 | GAC 51 | 8,7      | 2 | 8 | Heteroplasmy | 8        | 1 | 8 | Homoplasmy   |
|            |                                                 | GAC 54 | 7,8      | 2 | 7 | Heteroplasmy | 7        | 1 | 7 | Homoplasmy   |
|            |                                                 | GAC 56 | 8,7      | 2 | 8 | Heteroplasmy | 7        | 1 | 7 | Homoplasmy   |
|            |                                                 | GAC 64 | 7,6      | 2 | 7 | Heteroplasmy | 7        | 1 | 7 | Homoplasmy   |

\*The cytosine (C) numbers of D310 variants are listed in order according to the detected sequencing peaks of thymidine (T)

Non-cancerous gastric mucosa

Gastric adenocarcinoma

Type I. Homoplasmic to homoplasmic alteration – without D310 mutation (n=17)

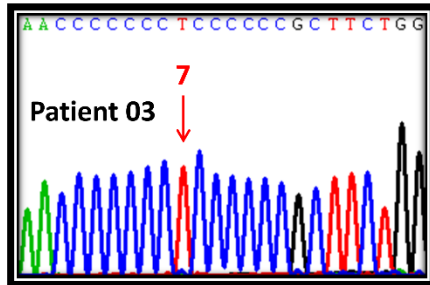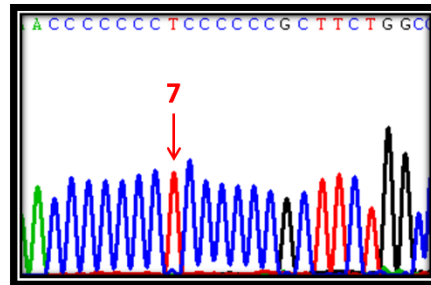

Type II. Heteroplasmic to heteroplasmic alteration – without D310 mutation (n=13)

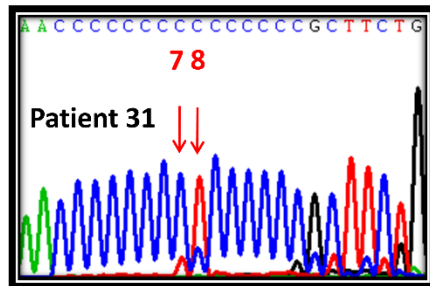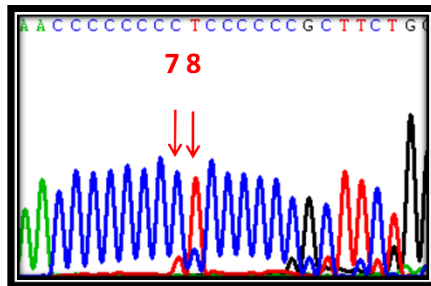

Type III. Heteroplasmic to heteroplasmic alteration – with D310 mutation (n=22)

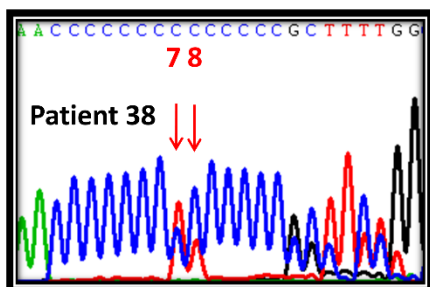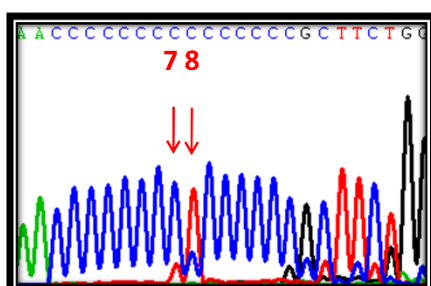

Type IV. Heteroplasmic to homoplasmic alteration – with D310 mutation (n=5)

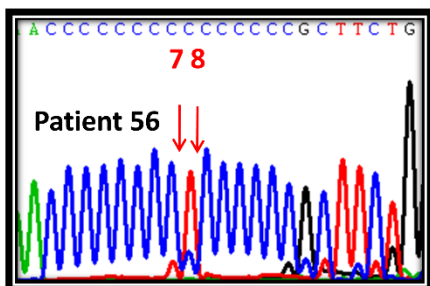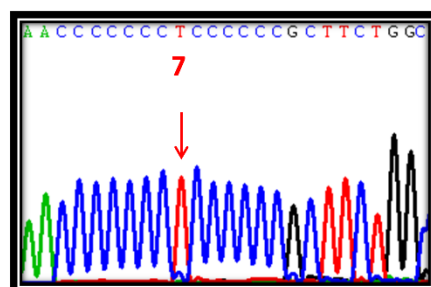

**Figure S1.** Types and representative cases to demonstrate the mitochondrial DNA D310 variants and their changes between NC-GM (left) and paired GAC (right). T (thymidine) is shown in red, A (adenine) in green, C (cytosine) in blue and G (guanine) in black during sequencing. The Arabic number above the red arrow denotes the C number before the indicated T peak and the T peak height represents the relative quantity of the D310 variant. Abbreviations: NC-GM, non-cancerous gastric mucosa; GAC, gastric adenocarcinoma.

**Type I: Homoplasmic to homoplasmic alteration - without D310 mutation (n=17):** Take patient 03 as an example. His NC-GM harbors one kind of D310 variant, the C<sub>7</sub>TC<sub>6</sub>, and is named as homoplasmic D310 with C<sub>7</sub>TC<sub>6</sub> as the major one. His GAC also harbors one kind of D310 variant, the C<sub>7</sub>TC<sub>6</sub>, and is named as homoplasmic D310 with C<sub>7</sub>TC<sub>6</sub> as the major one. No significant shift of the D310 sequence variations is noted. As a result, patient 03 is defined as homoplasmic to homoplasmic alteration without D310 mutation.

**Type II: Heteroplasmic to heteroplasmic alteration - without D310 mutation (n=13):** Take patient 31 as an example. His NC-GM harbors 2 kinds of D310 variants, the C<sub>8</sub>TC<sub>6</sub> and C<sub>7</sub>TC<sub>6</sub> in order, and is named as heteroplasmic D310 with C<sub>8</sub>TC<sub>6</sub> as the major one. His GAC also harbors 2 kinds of D310 variants, the C<sub>8</sub>TC<sub>6</sub> and C<sub>7</sub>TC<sub>6</sub> in order, and is named as heteroplasmic D310 with C<sub>8</sub>TC<sub>6</sub> as the major one. No significant shift of the D310 sequence variations is noted. As a result, patient 31 was defined as heteroplasmic to heteroplasmic alteration without D310 mutation.

**Type III, Heteroplasmic to heteroplasmic alteration - with D310 mutation (n=22):** Take patient 38 as an example. His NC-GM harbors 2 kinds of D310 variants, the C<sub>7</sub>TC<sub>6</sub> and C<sub>8</sub>TC<sub>6</sub> in order, and is named as heteroplasmic D310 with C<sub>7</sub>TC<sub>6</sub> as the major one. His GAC harbors 2 kind of D310 variants, the C<sub>8</sub>TC<sub>6</sub> and C<sub>7</sub>TC<sub>6</sub> in order, and is named as heteroplasmic D310 with C<sub>8</sub>TC<sub>6</sub> as the major one. Significant shift of the D310 sequence variations is noted. As a result, patient 38 is defined as heteroplasmic to heteroplasmic alteration with D310 mutation.

**Type IV, Heteroplasmic to homoplasmic alteration - with D310 mutation (n=5):** Take patient 56 as an example. His NC-GM harbors 2 kinds of D310 variants, the C<sub>8</sub>TC<sub>6</sub> and C<sub>7</sub>TC<sub>6</sub> in order, and is named as heteroplasmic D310 with C<sub>8</sub>TC<sub>6</sub> as the major one. His GAC harbors one kind of D310 variant, the C<sub>7</sub>TC<sub>6</sub>, and is named as homoplasmic D310 with C<sub>7</sub>TC<sub>6</sub> as the major one. Significant shift of the D310 sequence variations is noted. As a result, patient 56 is defined as heteroplasmic to homoplasmic alteration with D310 mutation.

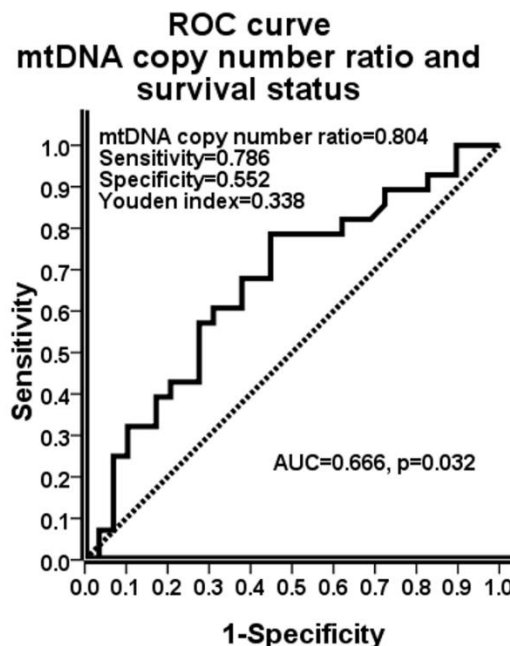

**Figure S2.** ROC curve (AUC=0.666, 95%CI=0.523-0.808,  $p=0.032$ ) is plotted to figure out the optimal mtDNA copy number ratio to distinguish survival status of the 57 GAC patients. It demonstrates mtDNA copy number ratio of 0.804 harbors

the highest Youden index of 0.338 (Sensitivity=0.786, Specificity=0.552). ROC: receiver operating characteristic, AUC: area under the curve

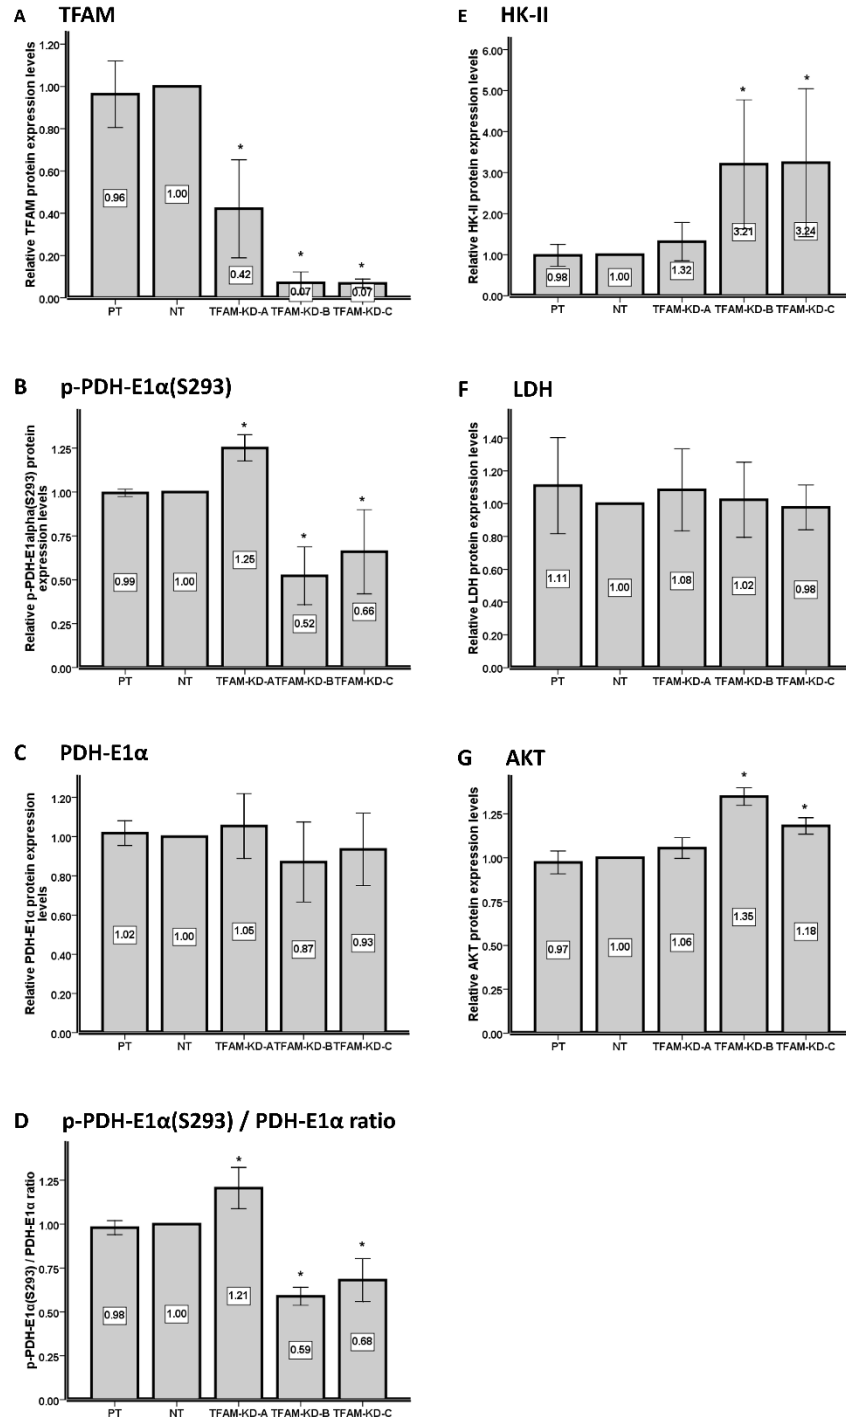

**Figure S3.** Relative protein expression levels of (A) TFAM, (B) p-PDH-E1α(S293), (C) PDH-E1α, (E) HK-II, (F) LDH and (G) AKT as well as (D) p-PDH-E1α(S293)/PDH-E1α ratios among PT, NT, TFAM-KD-A, TFAM-KD-B and TFAM-KD-C cells are shown. The expression level of NT is defined as 1.00. The symbol \* denotes a significant difference is achieved as compared to NT ( $p < 0.05$ ). TAFM: mitochondrial transcription factor A; PDH-E1α: pyruvate dehydrogenase E1α sub-

unit; p-PDH-E1 $\alpha$  (293): phosphorylated pyruvate dehydrogenase E1 $\alpha$  subunit; HK-II: hexokinase II; LDH: lactate dehydrogenase; AKT: v-akt murine thymoma viral oncogene homolog 1 gene (*AKT*)-encoded AKT; NT: Null target; PT: Parental

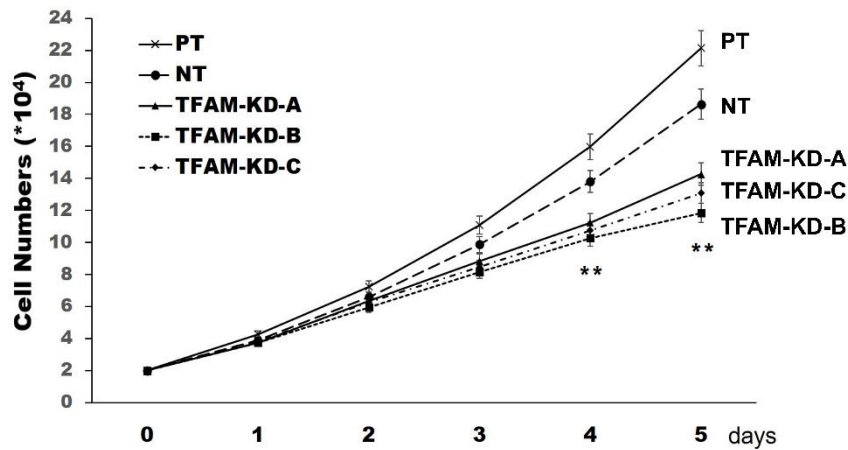

**Figure S4.** Cell proliferation rates of PT, NT, TFAM-KD-A, TFAM-KD-B and TFAM-KD-C cells are illustrated. An aliquot of  $2 \times 10^4$  cells were plated in 35 mm culture dishes (day 0) and incubated in 5% CO<sub>2</sub> at 37°C. Cells were incubated in culture medium with Puromycin (NT, TFAM-KD-A, TFAM-KD-B, and TFAM-KD-C cells) or without Puromycin (PT cells). Viable cells were determined with trypan blue (0.4%), and counted by Countess 3 Automated Cell Counter (Invitrogen) in triplicate on days 1, 2, 3, 4, and 5, and the cell proliferation curves were drawn (Mean $\pm$ SD, N=3). The symbol \*\* denotes  $p < 0.01$  when the TFAM-KD-A/B /-C are compared with NT, respectively. NT: Null target; PT: Parental

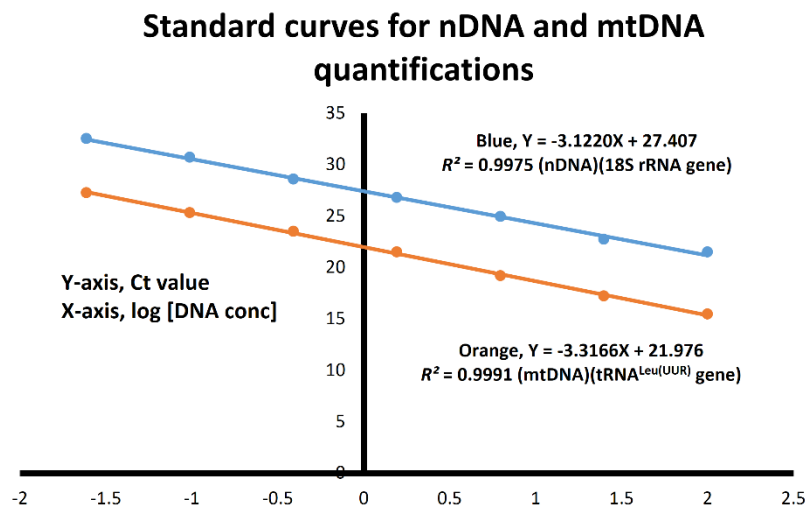

**Figure S5.** Standard curves for nDNA ( $R^2=0.9975$ ) and mtDNA ( $R^2=0.9991$ ) quantification are plotted. X and Y stand for log[DNA conc.] and Ct value, respectively. Total cellular DNA of AGS cells were serially diluted 4-folded from 100 ng/ $\mu$ L ( $X=\log 100=2.00000$ ) to 0.024414 ng/ $\mu$ L ( $X=\log 0.024414=-1.61236$ ) for Q-PCR to detect Ct values of mtDNA and nDNA, respectively. Blue line represents for nDNA and orange line for mtDNA, respectively.
